# Supplementary material
Source: publisher figshare collection journal article supplement (https://acs.figshare.com/ndownloader/files/4332601)
Supplement: Supplementary file 1 [file 4332601]

## Supporting information

# Fabrication of Hollow Self-Assembled Peptide Microvesicles and Transition from Sphere-to-Rod Structure

**Sibaprasad Maity, Poulami Jana, Suman K Maity and Debasish Haldar\***

*Department of Chemical Sciences, Indian Institute of Science Education and Research-Kolkata,  
Mohanpur, West Bengal-741246, India.*

*Fax: +913473279131 ; Tel: +913473279130;  
E-mail: deba\_h76@yahoo.com*

## Table of contents

|                |   |            |    |
|----------------|---|------------|----|
| Figure S1 & 2  | 2 | Figure S10 | 9  |
| Figure S3 & S4 | 3 | Figure S11 | 10 |
| Figure S5      | 4 | Figure S12 | 11 |
| Figure S6      | 5 | Figure S13 | 12 |
| Figure S7      | 6 | Figure S14 | 13 |
| Figure S8      | 7 | Figure S15 | 14 |
| Figure S9      | 8 | Figure S16 | 15 |

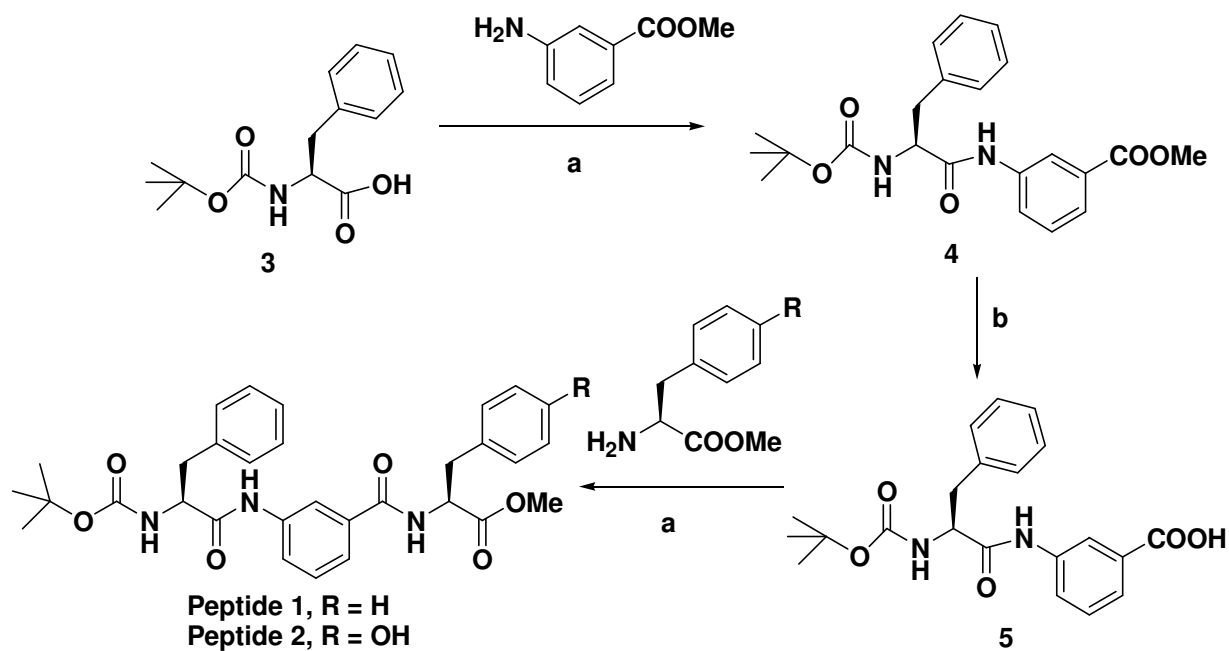

Figure S1: Synthesis of peptides **1** and **2**. Reactions and conditions: (a) Dry DCM, DCC, HOBT,  $0^\circ\text{C}$ . (b) MeOH, 2(N) NaOH.

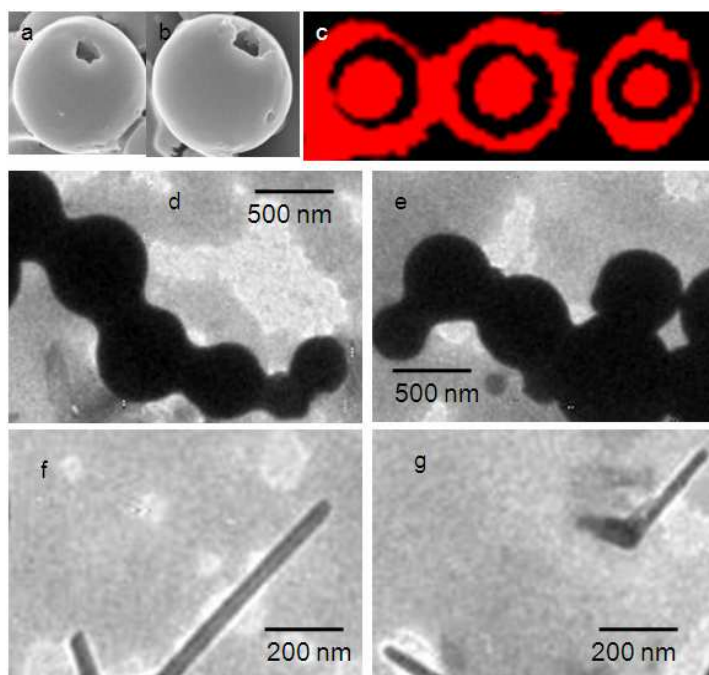

Figure S2: (a) and (b) Hollow microspheres of peptide **2** by FE-SEM; (c) Confocal microscopic images of Rhodamine 6G encapsulated peptide **1** hollow microspheres; (d) and (e) TEM images showing the fusion of microvesicles of peptide **1**; (f) and (g) TEM images of nanorod obtained from peptide **1**.

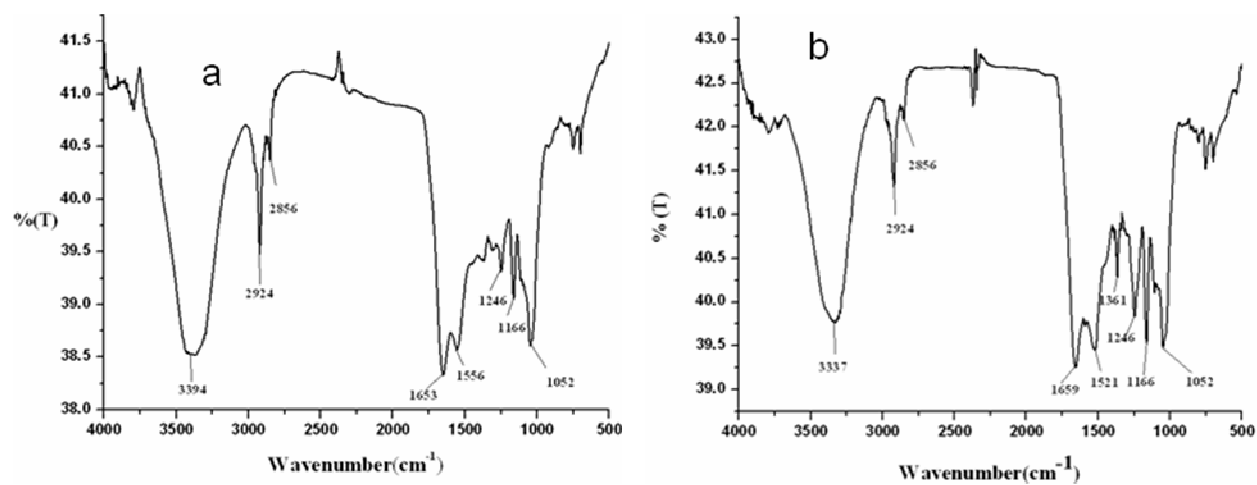

Figure S3. FT-IR spectra of peptide **1** and **2** vesicles.

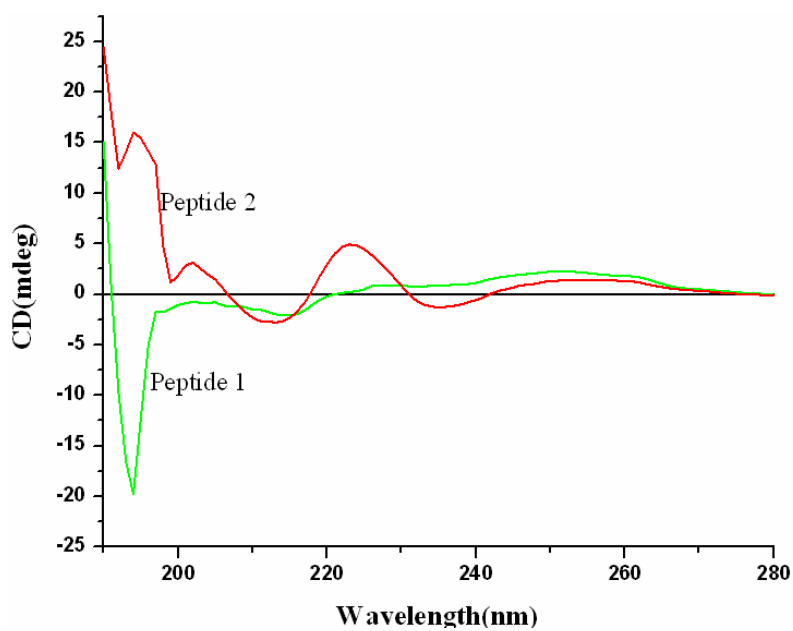

Figure S4. CD spectra of peptide **1** and **2** at 0.4 mM concentration.

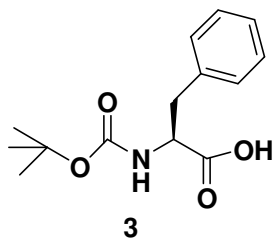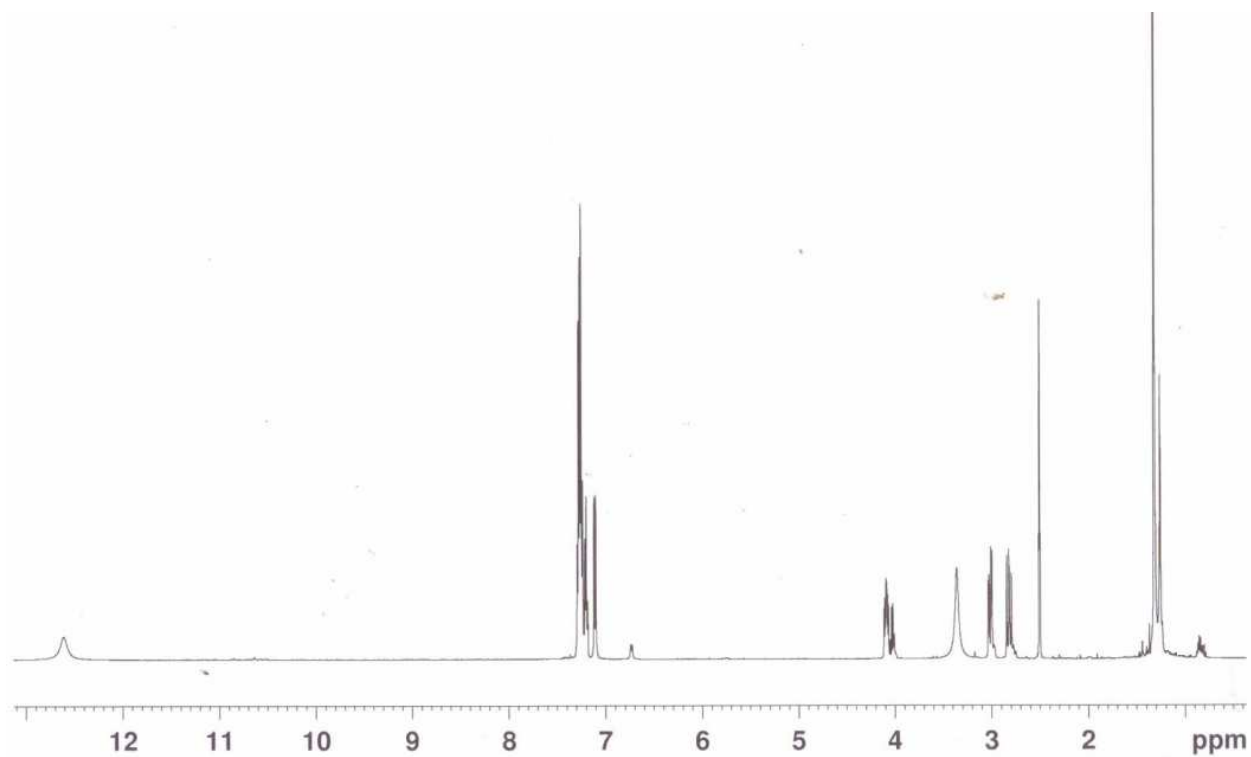

Figure S 5: <sup>1</sup>H NMR (DMSO-d<sub>6</sub>, 500MHz,  $\delta_{\text{ppm}}$ ) spectra of Boc-Phe-OH 3.

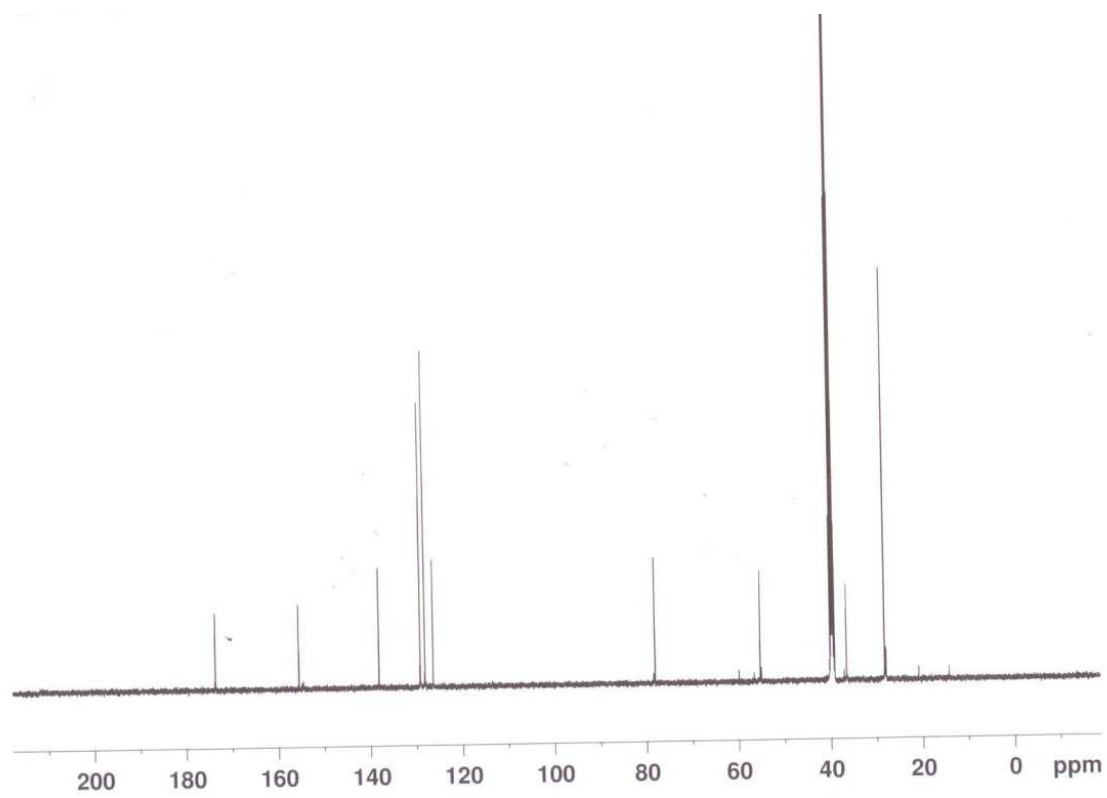

Figure S 6:  $^{13}\text{C}$  NMR (DMSO- $d_6$ , 125MHz,  $\delta_{\text{ppm}}$ ) spectra of Boc-Phe-OH 3

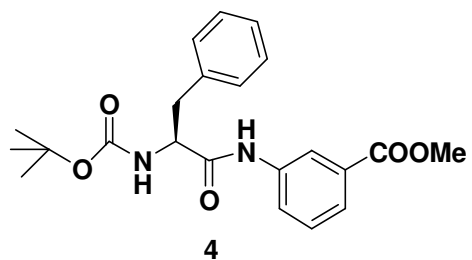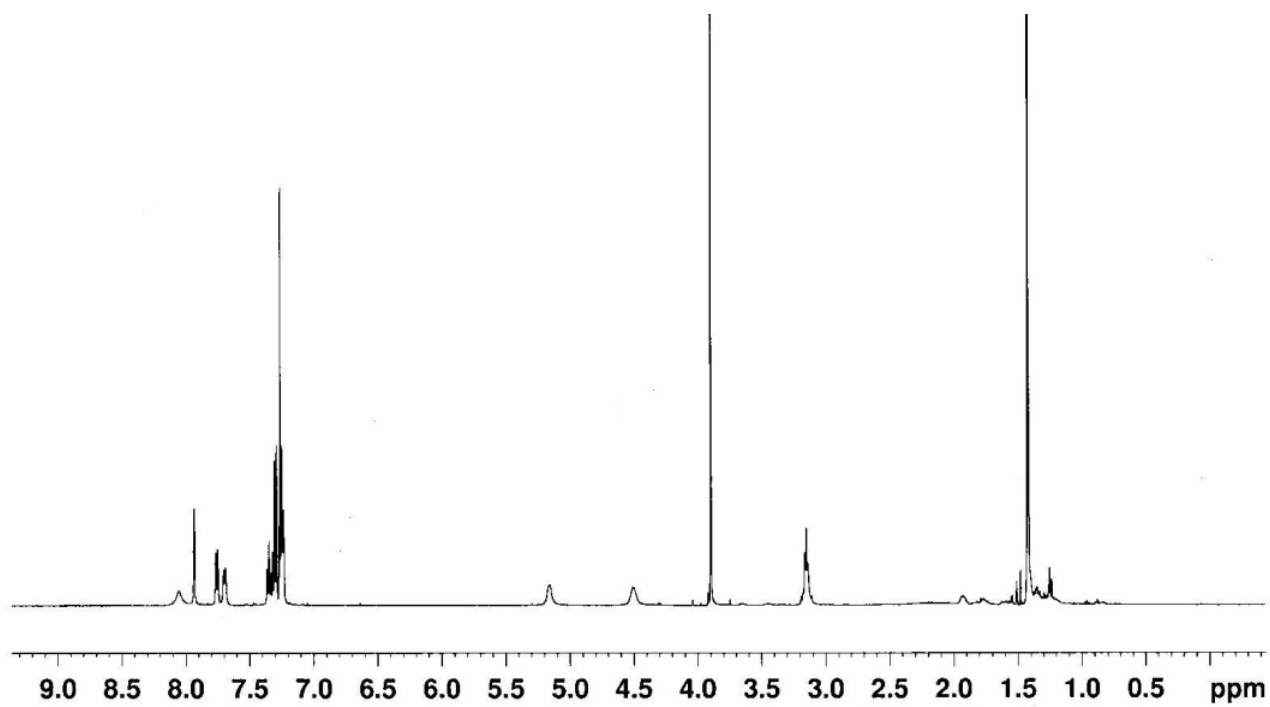

Figure S 7:  $^1\text{H}$  NMR (CDCl<sub>3</sub>, 500MHz,  $\delta_{\text{ppm}}$ ) spectra of Boc-Phe-Maba-OMe 4

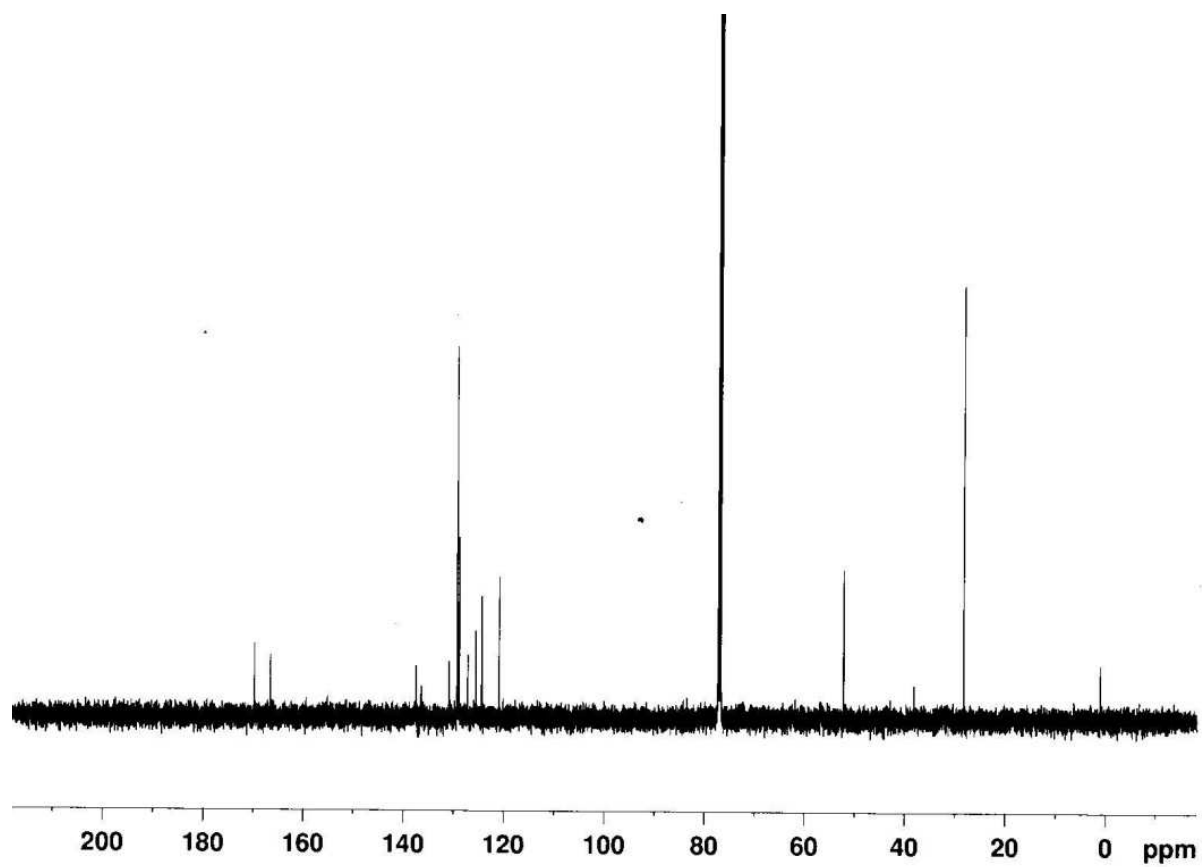

Figure S 8:  $^{13}\text{C}$  NMR ( $\text{CDCl}_3$ , 125MHz,  $\delta_{\text{ppm}}$ ) spectra of Boc-Phe-Maba-OMe 4

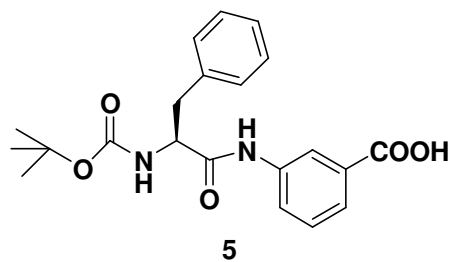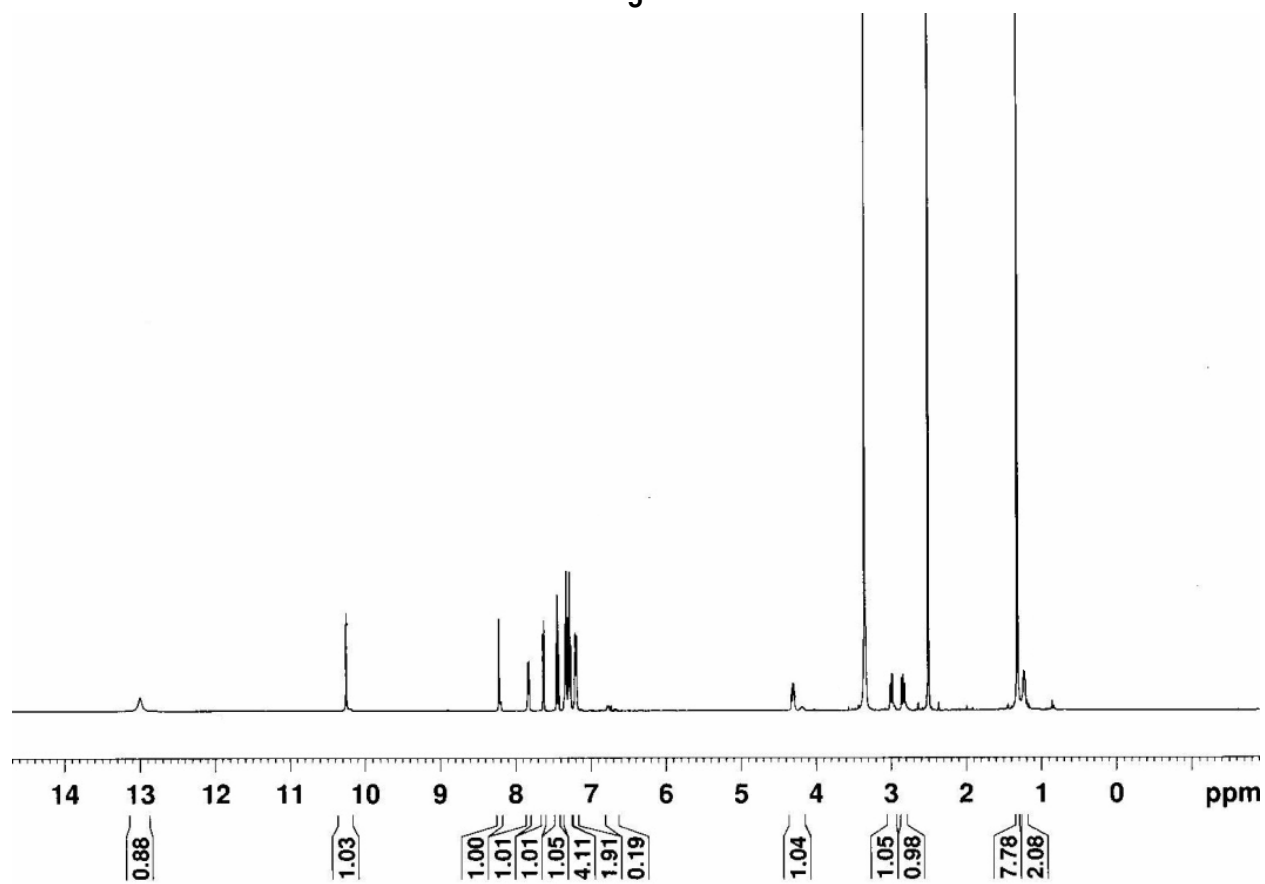

Figure S 9:  $^1\text{H}$  NMR (DMSO- $\text{d}_6$ , 500MHz,  $\delta_{\text{ppm}}$ ) spectra of Boc-Phe-Maba-OH 5



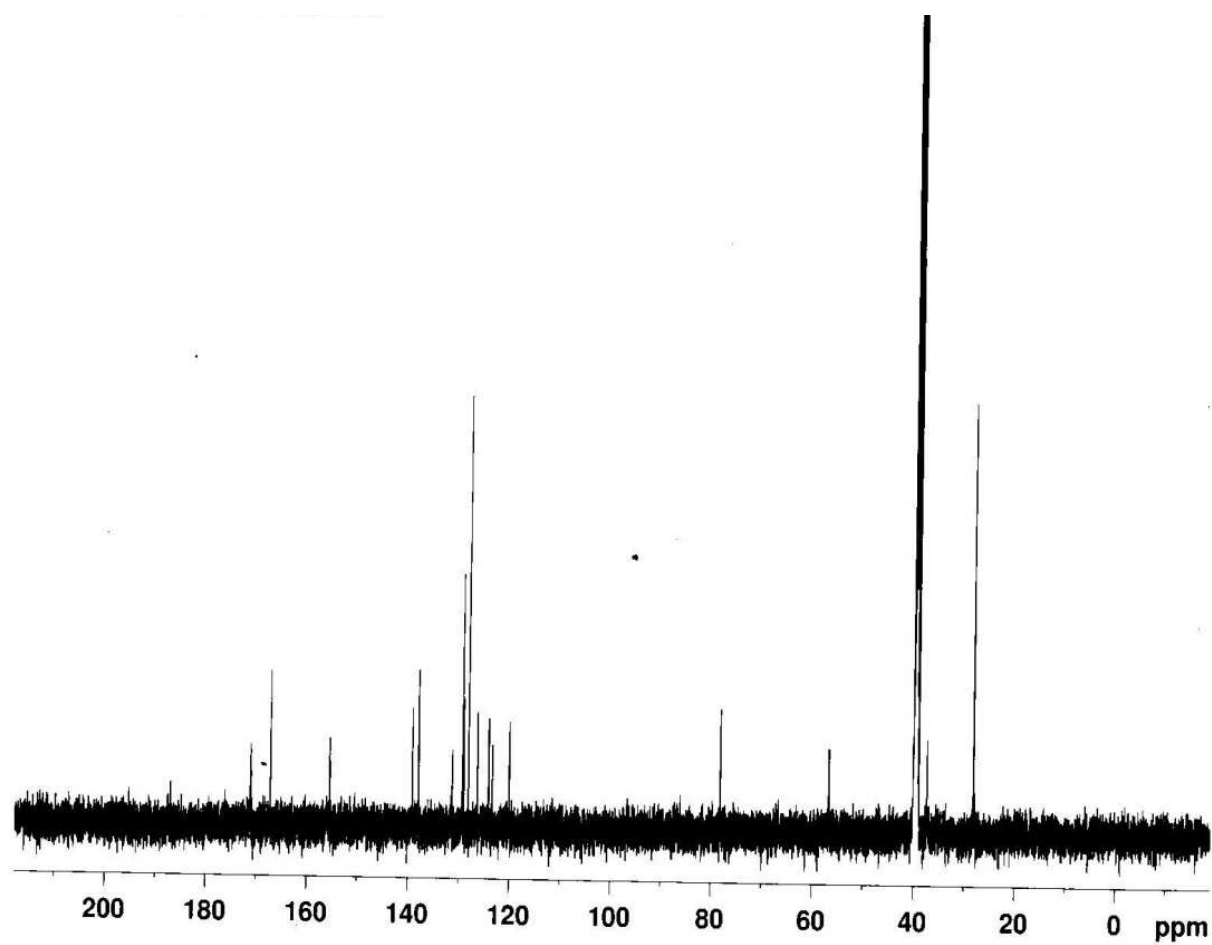

Figure S 10:  $^{13}\text{C}$  NMR (DMSO- $\text{d}_6$ , 125MHz,  $\delta_{\text{ppm}}$ ) spectra of Boc-Phe-Maba-OH 5.

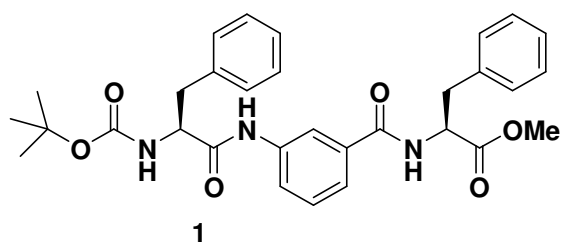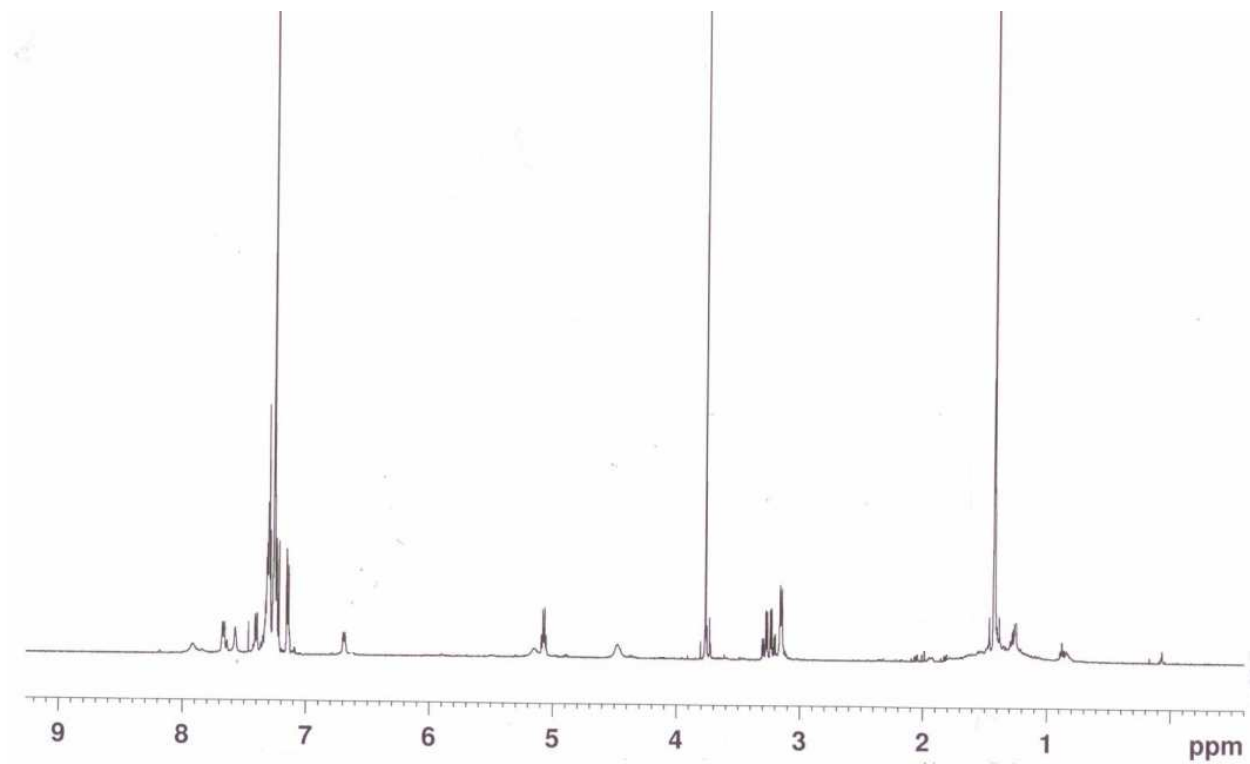

Figure S 11:  $^1\text{H}$  NMR ( $\text{CDCl}_3$ , 500MHz,  $\delta_{\text{ppm}}$ ) Spectra of Boc-Phe-Maba-Phe-OMe 1.

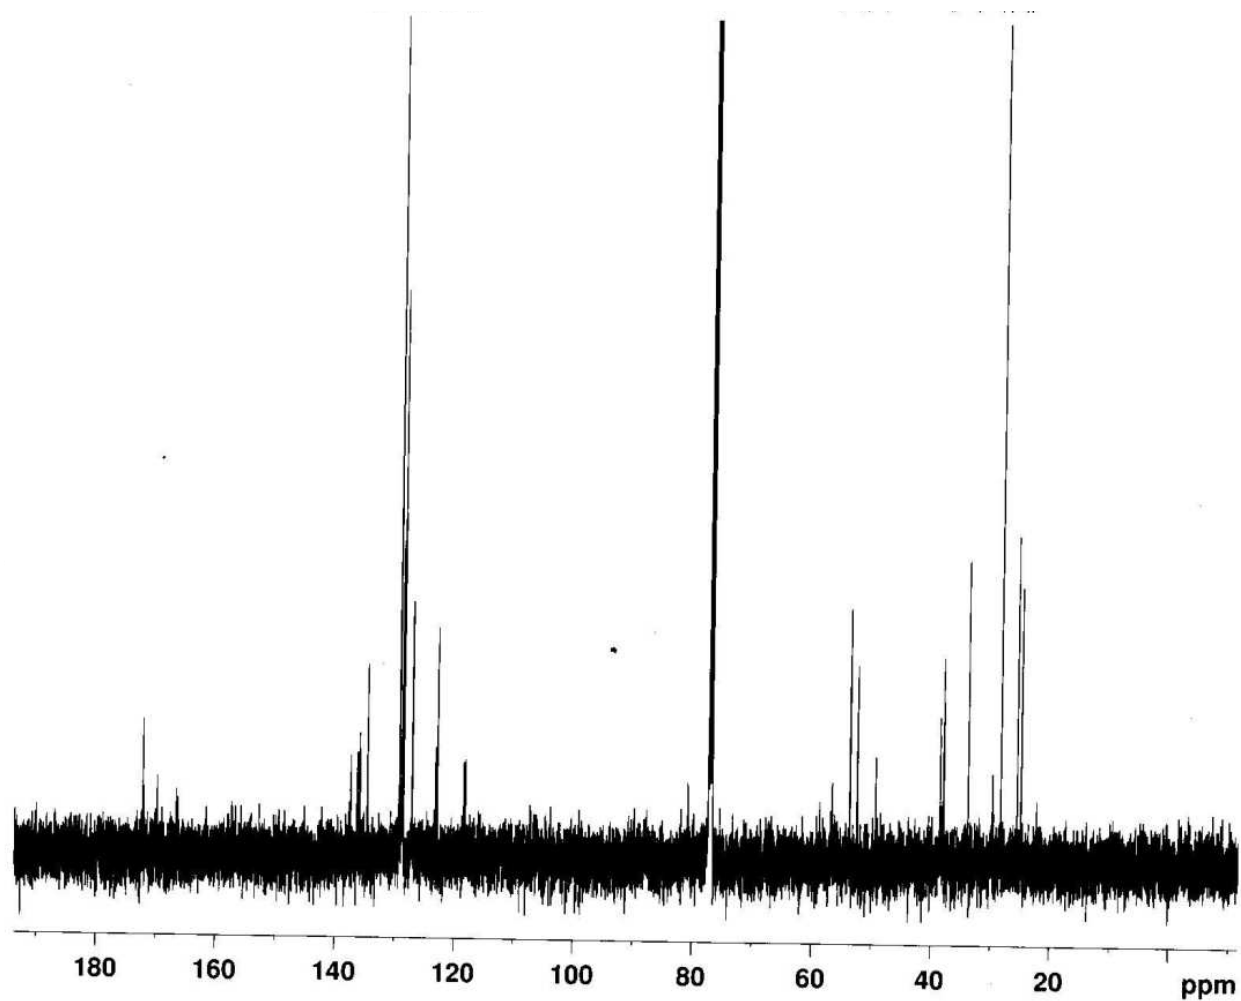

Figure S 12:  $^{13}\text{C}$  NMR ( $\text{CDCl}_3$ , 125MHz,  $\delta_{\text{ppm}}$ ) Spectra of Boc-Phe-Maba-Phe-OMe 1.

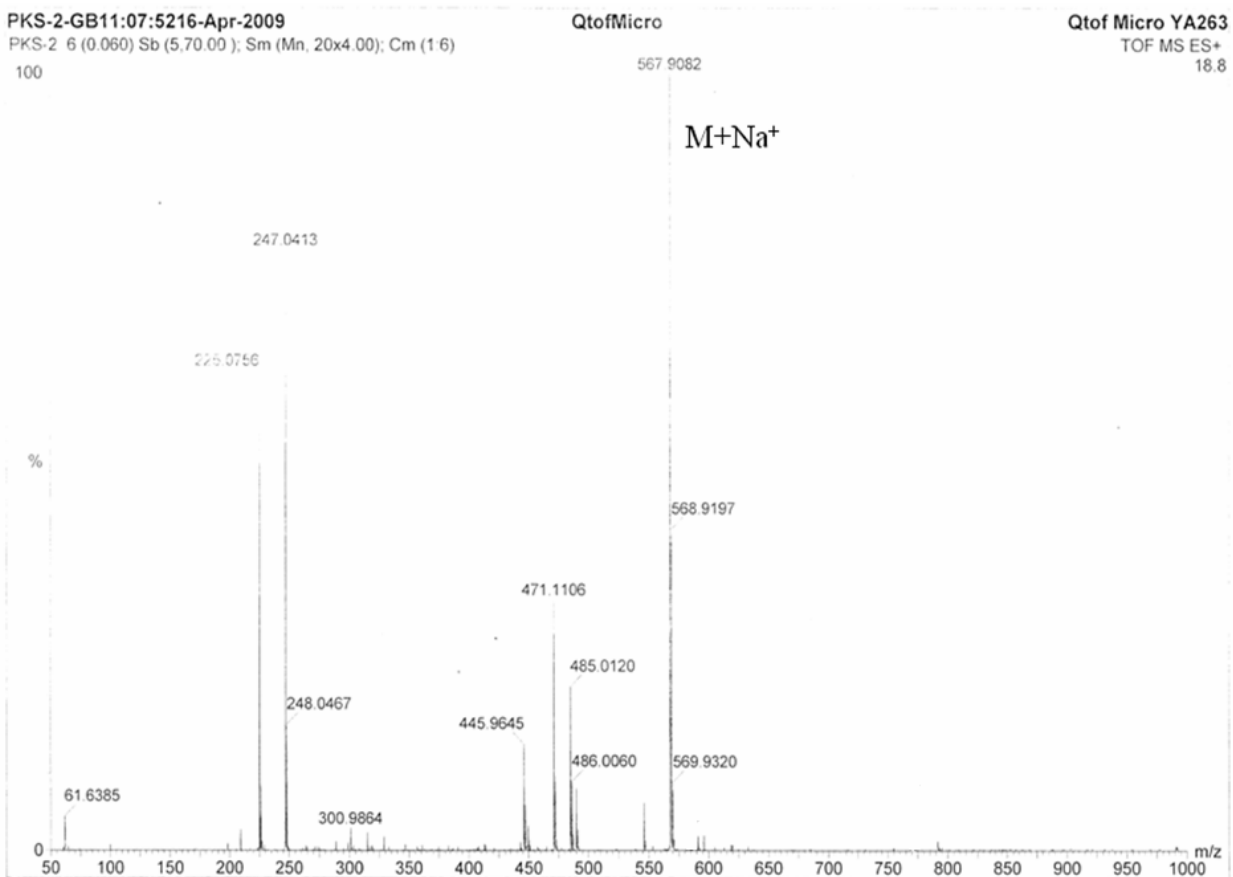

Figure S 13: Mass Spectra of Boc-Phe-Maba-Phe-OMe **1**.

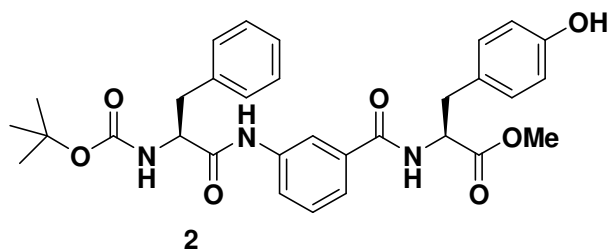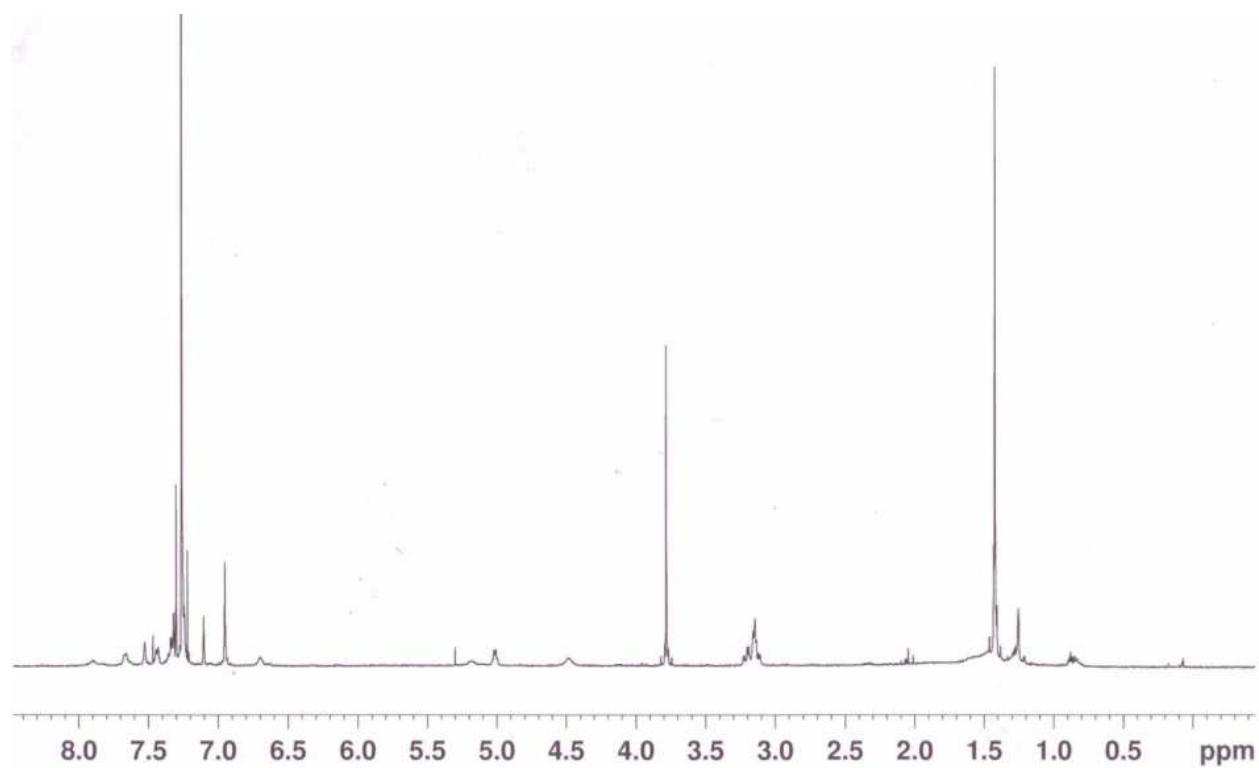

Figure S 14:  $^1\text{H}$  NMR ( $\text{CDCl}_3$ , 500MHz,  $\delta_{\text{ppm}}$ ) Spectra of Boc-Phe-Maba-Tyr-OMe **2**.

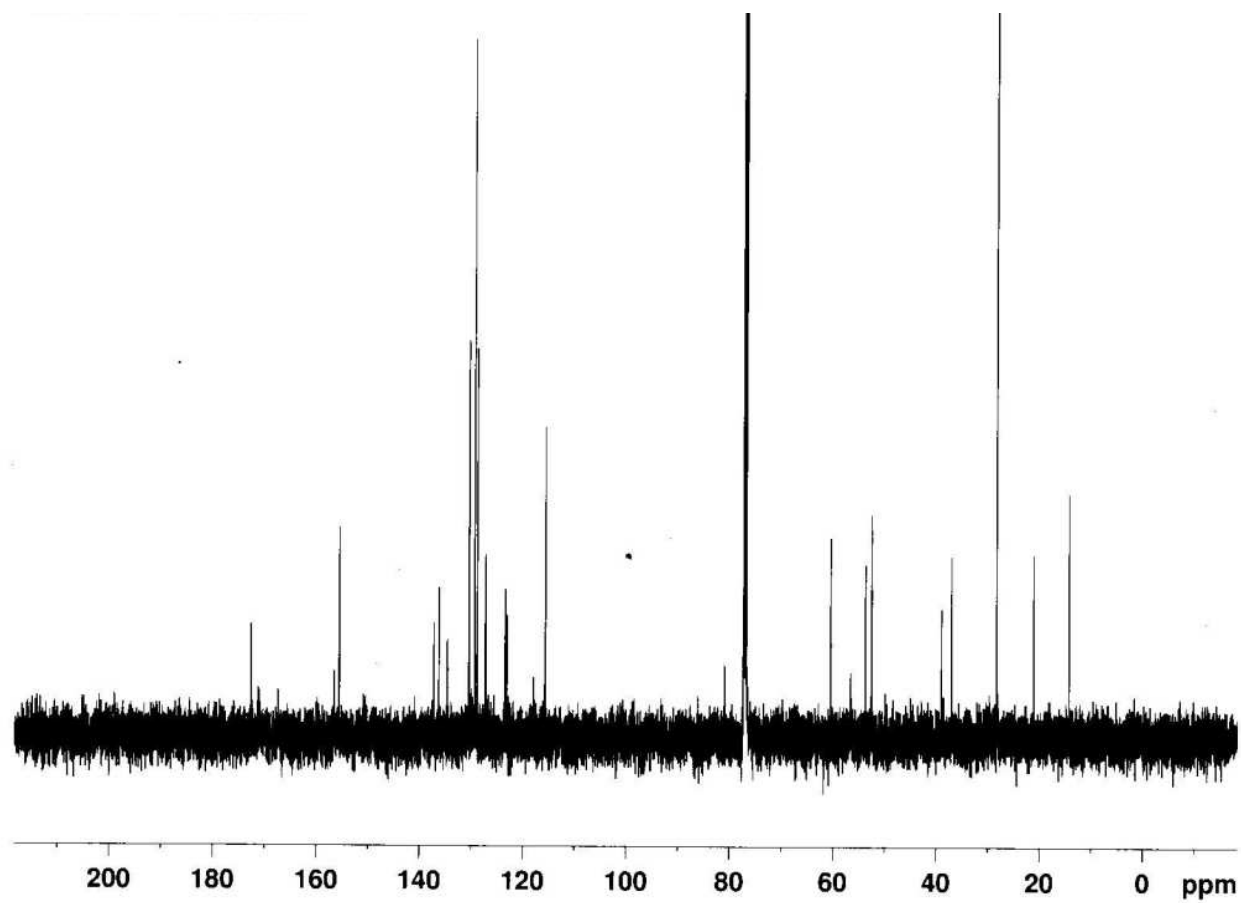

Figure S 15:  $^{13}\text{C}$  NMR ( $\text{CDCl}_3$ , 125MHz,  $\delta_{\text{ppm}}$ ) Spectra of Boc-Phe-Maba-Tyr-OMe **2**.

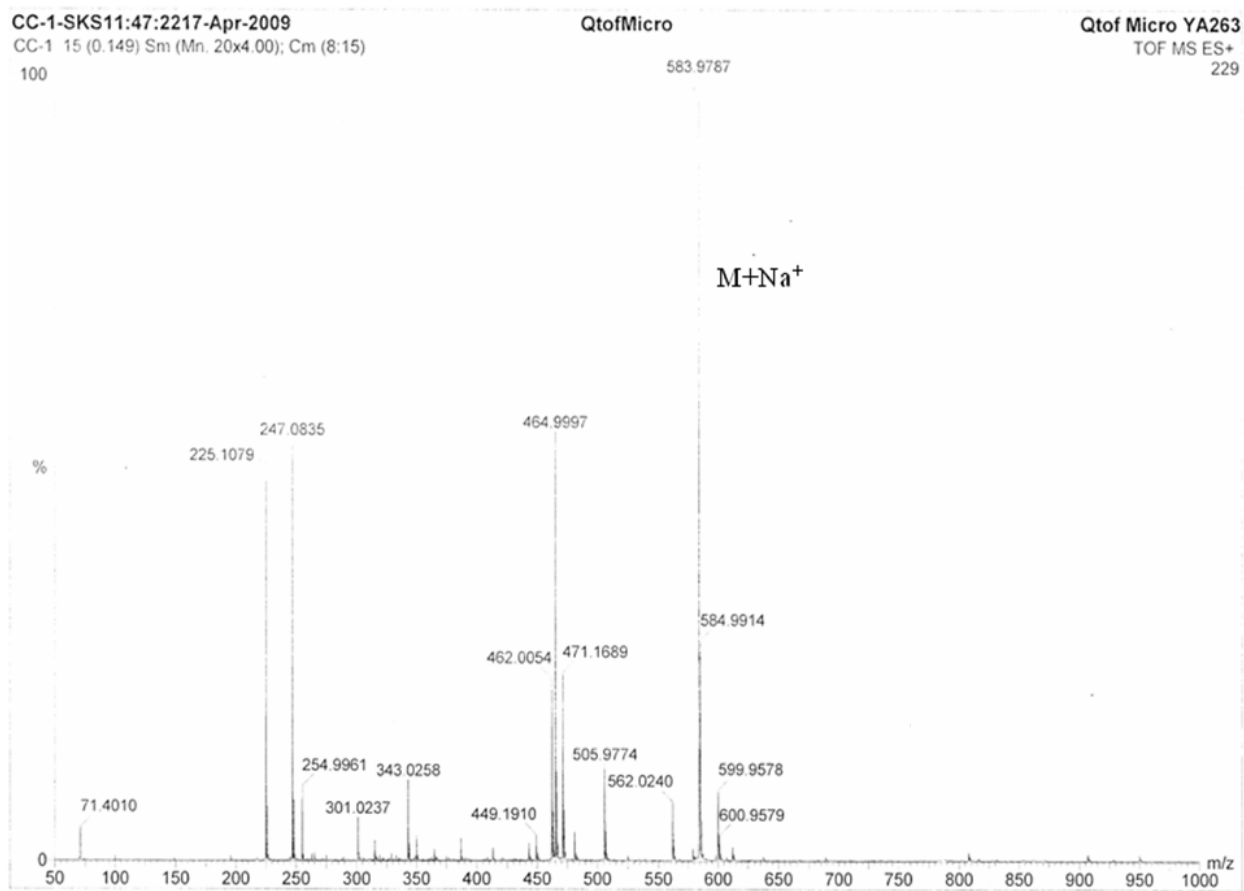

Fig S 16: Mass Spectra of Boc-Phe-Maba-Tyr-OMe 2
